# Supplementary material for: Transcription Factor SlAREB1 Is Involved in the Antioxidant Regulation under Saline–Alkaline Stress in Tomato
Source: Antioxidants (Basel). 2022 Aug 27;11(9):1673. doi: 10.3390/antiox11091673 (PMC9495317; doi:10.3390/antiox11091673)
Supplement: Supplementary file 1 [file antioxidants-11-01673-s001.zip]

Archive with 4 entries (4 files):
- Supplementary figure.pdf
- Table S1.xls
- Table S2.xls
- Table S3.xls
