# Supplementary material for: Transcription Factor SlAREB1 Is Involved in the Antioxidant Regulation under Saline–Alkaline Stress in Tomato
Source: Antioxidants (Basel). 2022 Aug 27;11(9):1673. doi: 10.3390/antiox11091673 (PMC9495317; doi:10.3390/antiox11091673)
Supplement: Supplementary file 1 [file antioxidants-11-01673-s001.zip › Table S1.xls]

## Sheet: Sheet1
Table S1. ABF protein properties and their clade-distributions in land plants.
Species	Gene name	Gene ID	Protein length (aa)	Molecular Mass (KDa)	Theoretical pI
Arabidopsis thaliana	A.thalinana_ABF1	At1g49720	403	43.8949	8.9
Arabidopsis thaliana	A.thalinana_ABF2/AREB1	At1g45249	431	45.8834	9.49
Arabidopsis thaliana	A.thalinana_ABF3	At4g34000	454	49.677	8.66
Arabidopsis thaliana	A.thalinana_ABF4/AREB2	At3g19290	432	46.6202	9.61
Solanum lycopersicum	S.lycopersicum_ABF1	Solyc01g108080	414	45.0283	9.64
Solanum lycopersicum	S.lycopersicum_ABF2/AREB1	Solyc04g078840	447	47.9777	9.42
Solanum lycopersicum	S.lycopersicum_ABF3	Solyc10g050210	388	42.4169	9.86
Solanum lycopersicum	S.lycopersicum_ABF4/AREB2	Solyc11g044560	399	44.1357	8.83
Vitis vinifera	V.vinifera_ABF1	VIT_03s0063g00310	409	44.3578	9.68
Vitis vinifera	V.vinifera_ABF2	VIT_18s0001g10450	447	47.8789	9.41
Zea mays	Z.mays_ABF1	GRMZM2G002075	295	32.1647	9.43
Zea mays	Z.mays_ABF2	GRMZM2G479760	397	42.4084	9.92
Zea mays	Z.mays_ABF3	GRMZM2G478417	350	36.9387	6.52
Zea mays	Z.mays_ABF4	GRMZM2G033413	346	36.4321	5.88
Zea mays	Z.mays_ABF5	GRMZM2G157722	356	37.6925	5.44
Oryza sativa	O.sativa_TRAB1	LOC_Os08g36790	329	34.7703	8.62
Oryza sativa	O.sativa_ABF2	LOC_Os06g10880	324	34.7708	5.88
Oryza sativa	O.sativa_AREB1	LOC_Os02g52780	357	38.0995	9.27
Oryza sativa	O.sativa_AREB2	LOC_Os09g28310	376	39.9172	8.98
Brassica rapa	B.rapa_ABF1	Brara.K00967	429	48.4252	9.23
Brassica rapa	B.rapa_ABF2	Brara.J00626	387	41.6521	9.47
Brassica rapa	B.rapa_ABF3	Brara.C03735	355	39.2837	9.13
Brassica rapa	B.rapa_ABF4	Brara.E02271	409	44.4524	9.67
Brassica rapa	B.rapa_ABF5	Brara.F00358	368	40.341	9.26
Brassica rapa	B.rapa_ABF6	Brara.A02889	391	42.5144	9.62
Brassica rapa	B.rapa_ABF7	Brara.A00415	413	45.5855	9.35
Solanum tuberosum	S.tuberosum_AREB1	PGSC0003DMG400025889	414	45.0332	9.71
Solanum tuberosum	S.tuberosum_AREB2	PGSC0003DMG400008011	453	48.7947	9.5
Solanum tuberosum	S.tuberosum_AREB3	PGSC0003DMG400006211	414	45.3258	9.24
Solanum tuberosum	S.tuberosum_AREB4	PGSC0003DMG400022931	366	40.0648	8.95
Cucumis sativus	C.sativus_ABF1	XP_004144092	270	30.5104	9.35
Cucumis sativus	C.sativus_ABF2	XP_004142865	411	44.3518	9.55
Cucumis sativus	C.sativus_ABF3	XP_004140925	321	35.9125	8.56
Cucumis sativus	C.sativus_ABF4	XP_004136974	409	44.8757	9.53
Nicotiana tabacum	N.tabacum_ABF1	Nitab4.5_0000088g0120.1	506	55.7251	8.99
Nicotiana tabacum	N.tabacum_ABF2	Nitab4.5_0001692g0020.1	442	47.0298	9.47
Nicotiana tabacum	N.tabacum_ABF3	Nitab4.5_0000287g0240.1	434	46.9176	9.35
Nicotiana tabacum	N.tabacum_ABF4	Nitab4.5_0002543g0050.1	400	43.9775	8.99
