# Supplementary material for: Transcription Factor SlAREB1 Is Involved in the Antioxidant Regulation under Saline–Alkaline Stress in Tomato
Source: Antioxidants (Basel). 2022 Aug 27;11(9):1673. doi: 10.3390/antiox11091673 (PMC9495317; doi:10.3390/antiox11091673)
Supplement: Supplementary file 1 [file antioxidants-11-01673-s001.zip › Table S2.xls]

## Sheet: Sheet1
Table S2. Primers used for quantitative real-time PCR
Gene	Gene ID	Forward/reverse primers (5'-3')	Length (bp)	Amplicon (bp)
SlACTIN	Solyc03g078400.3	F: GGGATGGAGAAGTTTGGTGGTGG	23	166
		R: CTTCGACCAAGGGATGGTGTAGC	23
SlABF1	Solyc01g108080.2	F: GCGGAGTTATGGGGAAGAC	19	148
		R: CTTCCCCTTCCACCTTCAC	19
SlABF2/AREB1	Solyc04g078840.3	F: CGGCAGCCATCTATCTATTC	20	77
		R: GACCCAAAATCCTTACCACTC	21
SlABF3	Solyc10g050210.1	F: GGTTAGAGCAGGAGTGGTGAG	21	140
		R: CGGGGCTTTGAGTTGGT	17
SlABF4/AREB2	Solyc11g044560.1	F: GCGGGAATCTACCTTGGG	18	164
		R: GGGTTGCTTGTTGAAATGCT	20
SlSOD	Solyc06g049080.2	F: TGAATTGGGGTTGAACCATT	20	189
SlSOD		R: GCAGGCACTGTAATCTGCAA	20
