# Supplementary material for: Transcription Factor SlAREB1 Is Involved in the Antioxidant Regulation under Saline–Alkaline Stress in Tomato
Source: Antioxidants (Basel). 2022 Aug 27;11(9):1673. doi: 10.3390/antiox11091673 (PMC9495317; doi:10.3390/antiox11091673)
Supplement: Supplementary file 1 [file antioxidants-11-01673-s001.zip › Table S3.xls]

## Sheet: Sheet1
Table S3. List of primers used in this study
Primer name	Primer sequence (5'-3')	Length (bp)
For overexpression vector construction
SlAREB1-OE-F	GATGACGATGACAAGGAATTCATGGGGAGTAATTATCATTTCAAGAAC	48
SlAREB1-OE-R	GTCCTTGTAATCCATGAATTCTTACCATGGACCAGTTTGTGTCCGTCT	48
For overexpression plants detection
35s-F	ACGCACAATCCCACTATCCTTC	22
Gate8-R	CATAAAAATACGATAGTAACGGGTG	25
For yeast two-hybrid assay
pGBKT7-SlAREB1-F	TCAGAGGAGGACCTGCATATGATGGGGAGTAATTATCATTTCAAGAA	47
pGBKT7-SlAREB1(101-447)-F	TCAGAGGAGGACCTGCATATGTTGACTCTACCTAGGACACTGAGTCAT	48
pGBKT7-SlAREB1(201-447)-F	TCAGAGGAGGACCTGCATATGAGGAACACAGGTTTAATGGCTGG	44
pGBKT7-SlAREB1(301-447)-F	TCAGAGGAGGACCTGCATATGGGCGCTTCTCTAATGGGTGG	41
pGBKT7-SlAREB1-R	ACGATTCATCTGCAGCTCGAGCCATGGACCAGTTTGTGTCCG	42
pGADT7-SlMnSOD-F	GTACCAGATTACGCTCATATGATGGCTCTTCGGACTTTAGTGAGC	47
pGADT7-SlMnSOD-R	ACGATTCATCTGCAGCTCGAGGGGGCACTCATTTTCGTAAACA	48
For BiFC assay
SlAREB-cYFP-F	ATTTACGAACGATAGTTAATTAAATGGGGAGTAATTATCATTTCAAGAA	49
SlAREB-cYFP-R	ACTGCCACTTCCTCCACTAGTCCATGGACCAGTTTGTGTCCG	42
SlMnSOD-nYFP-F	ATTTACGAACGATAGTTAATTAAATGGCTCTTCGGACTTTAGTGAGC	47
SlMnSOD-nYFP-R	ACTGCCACCTCCTCCACTAGTGGGGCACTCATTTTCGTAAACA	43
For VIGS
pTRV2-AREB1-F	GTGAGAAGGTTACCGAATCATGGGGAGTAATTATCATTTCAAGAA	45
pTRV2-AREB1-R	CGTGAGCTCGGTACCGGATCCAGAGCCTTGCCTCTGCAAATG	42
